# Supplementary figures and images for: Transcription Factor GarWRKY5 Is Involved in Salt Stress Response in Diploid Cotton Species (Gossypium aridum L.)
Source: MDPI journal article supplement (doi:10.3390/ijms20215244), 2019-10-23

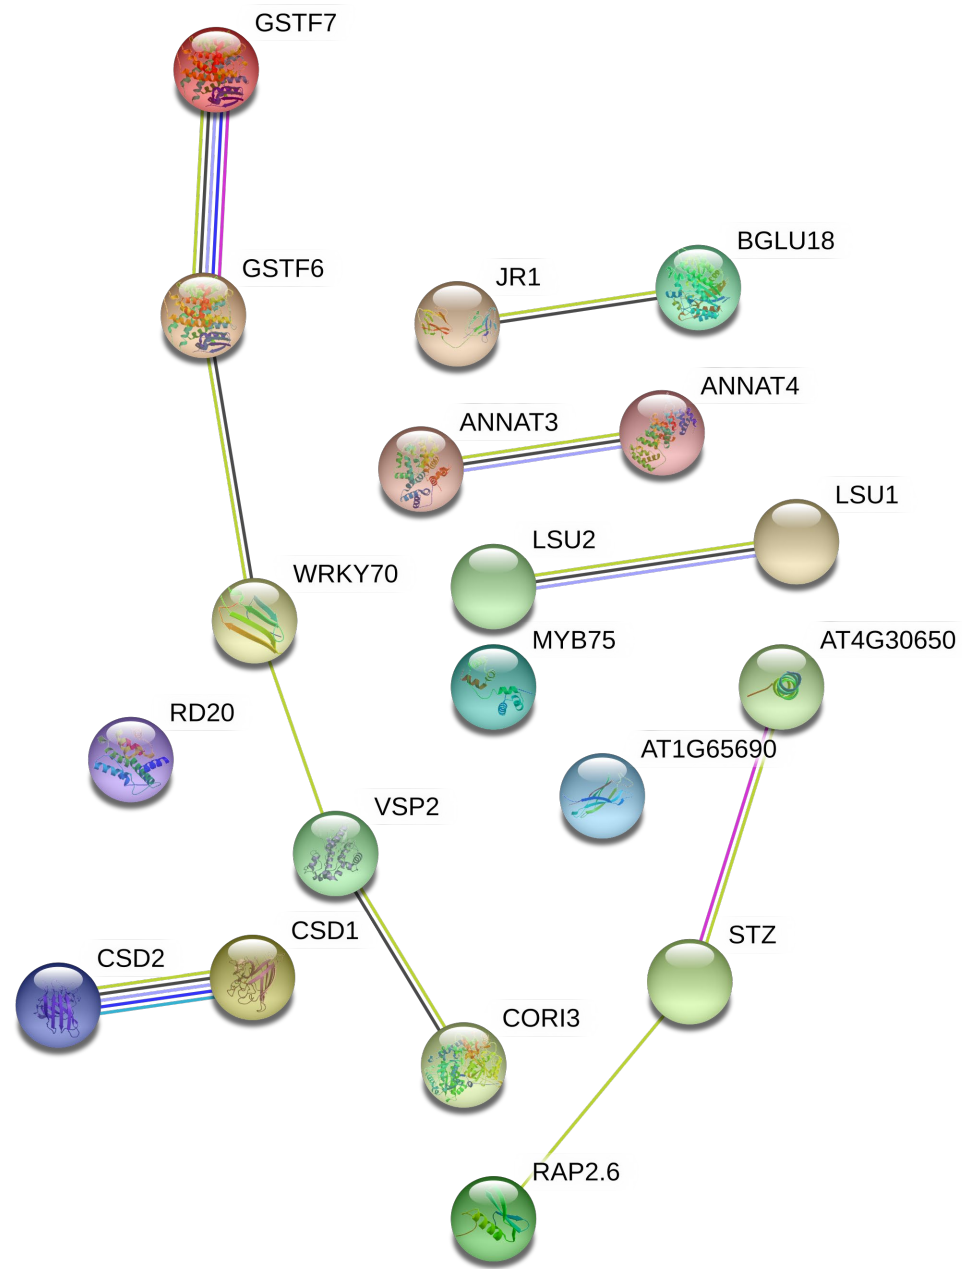

Supplement: s1 [file s1]
